# Supplementary material for: Zinc oxide-decorated polypyrrole/chitosan bionanocomposites with enhanced photocatalytic, antibacterial and anticancer performance
Source: Royal Society of Chemistry journal article supplement (doi:10.1039/c9ra06493a), 2019-01-01
Supplement: c9ra06493a1.pdf [file c9ra06493a1.pdf]

## Supplementary Information

In the present study ECSA was calculated from electrochemical double layer capacitance method as reported earlier<sup>52-54</sup> by plotting the graph between scan rates and current density. The current obtained from the CV curve was changed to current density using the following formula.

$$\text{Current density} = \frac{\text{Current} * 1000}{\text{Area of glassy carbon electrode}}$$

Where, area of 5 mm glassy carbon electrode is 0.19625 m<sup>2</sup>.

Now we calculate the electrochemical double layer capacitance ( $C_{dl}$ ) from the following equation:

$$v = \Delta J C_{dl}$$

Where  $v$  is the scan rates and  $C_{dl}$  is the linear slope equivalent to twice the  $C_{dl}$  was used to represent the ECSA.

A picture is shown below (Figure 1S) representing the complete circuit to perform cyclic voltammetry.

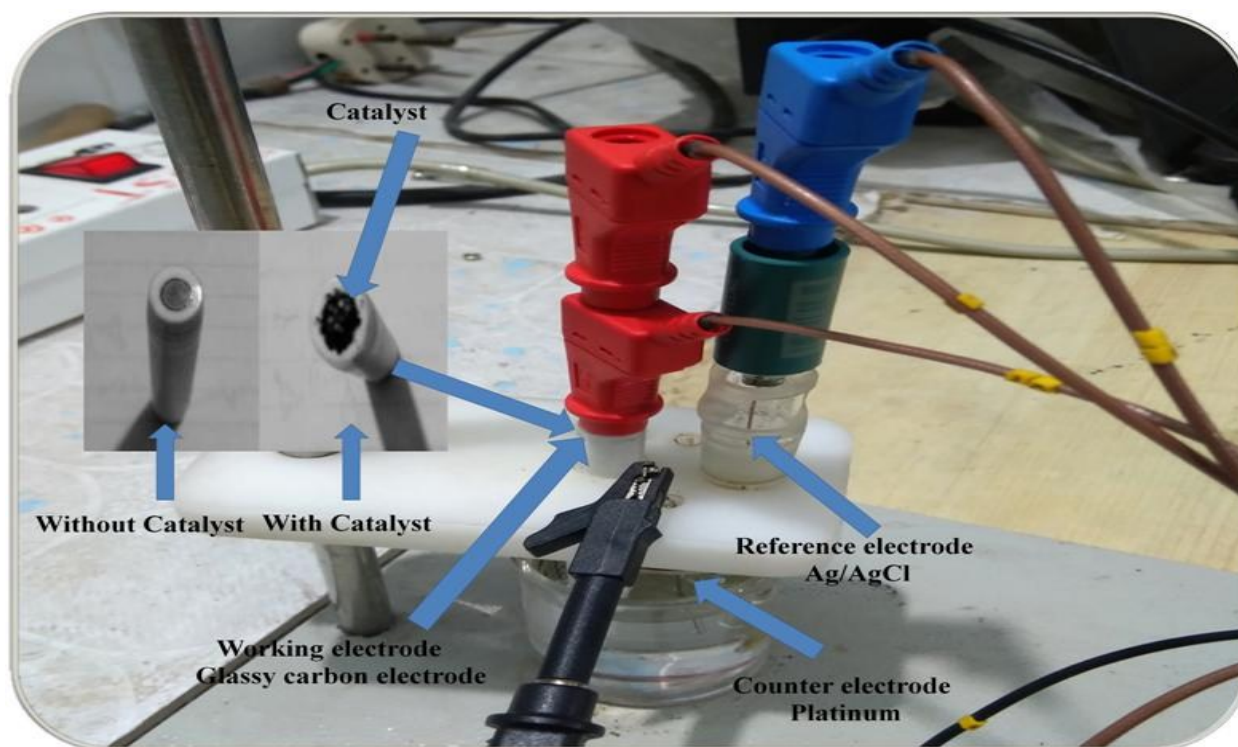

**Fig. 1S** Picture represents the circuit for the cyclic voltammetry performed.

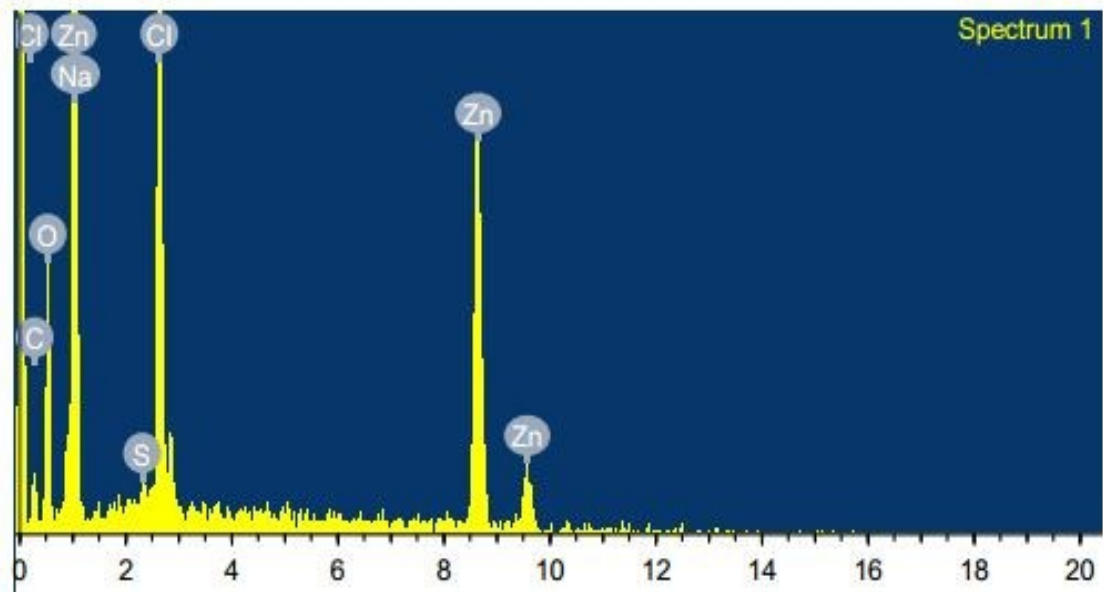

Fig. 2S EDX images to show the elemental composition of the as prepared bio-nanocomposite.

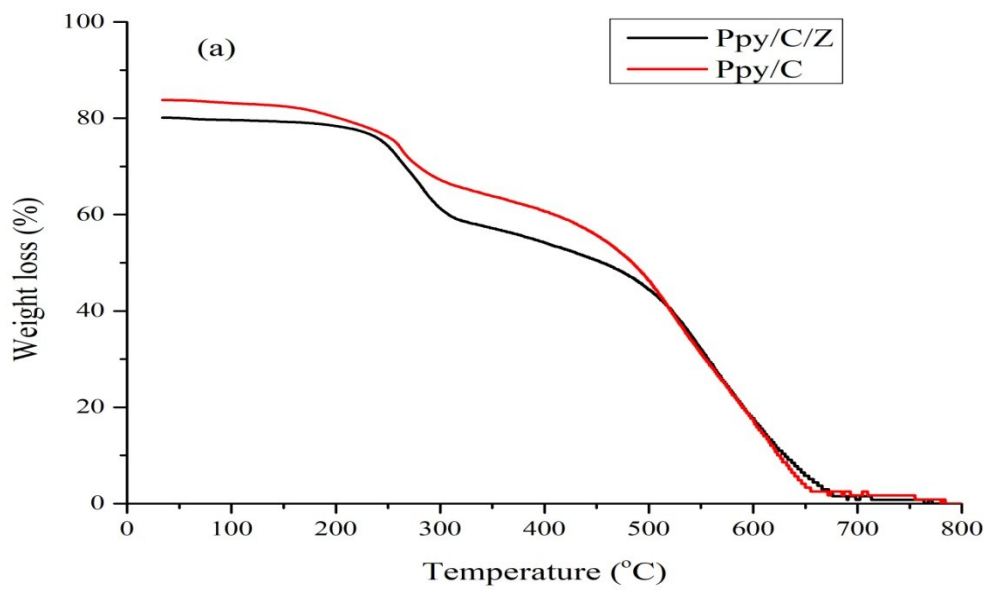

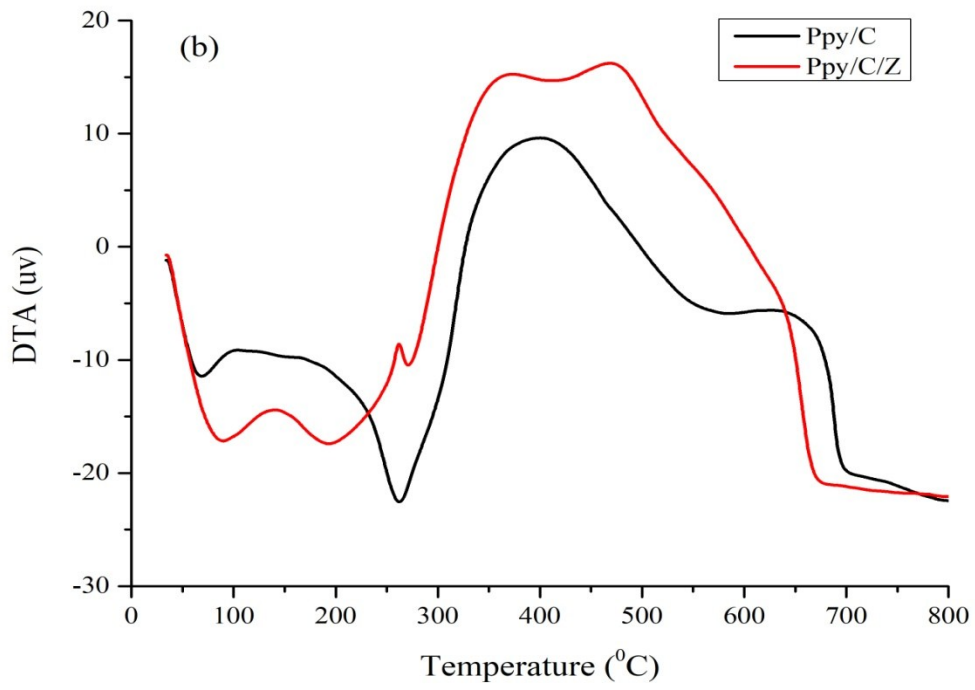

**Fig. 3S** TGA and DTA spectra of the as prepared nanocomposites materials.

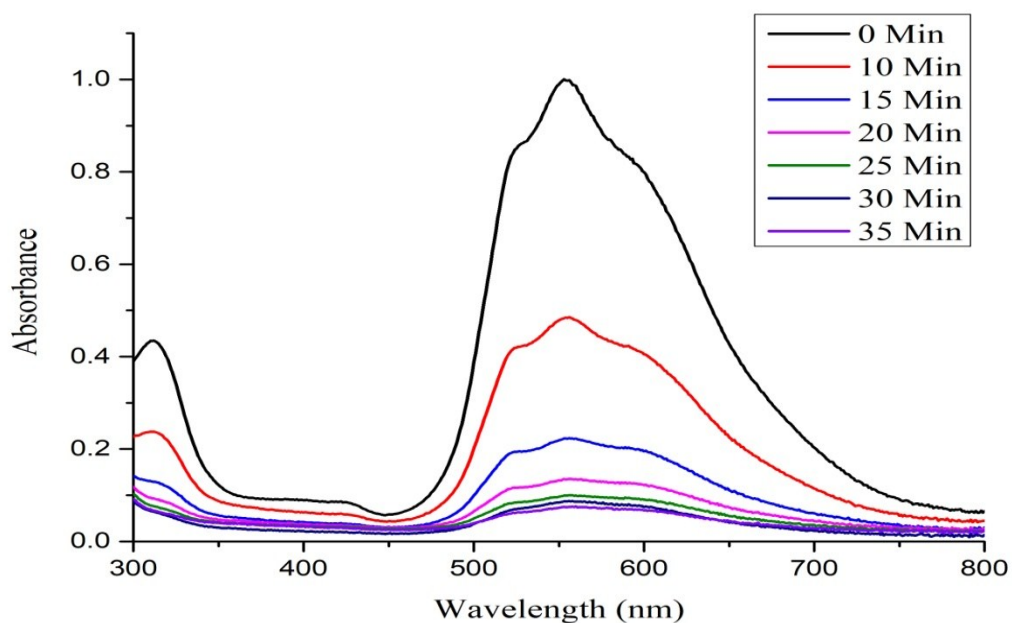

**Fig. 4S** UV-visible spectra of the photodegradation of CBB-R-250 dye over the Ppy/C/Z photocatalyst.

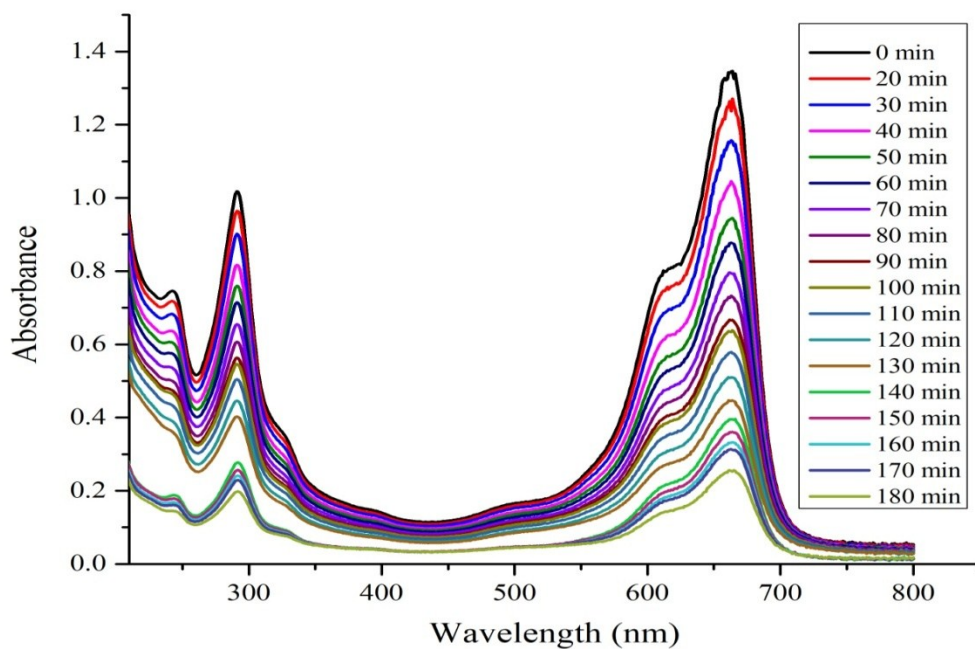

**Fig. 5S** UV-visible spectra of the photodegradation of MB dye over the Ppy/C/Z photocatalyst.

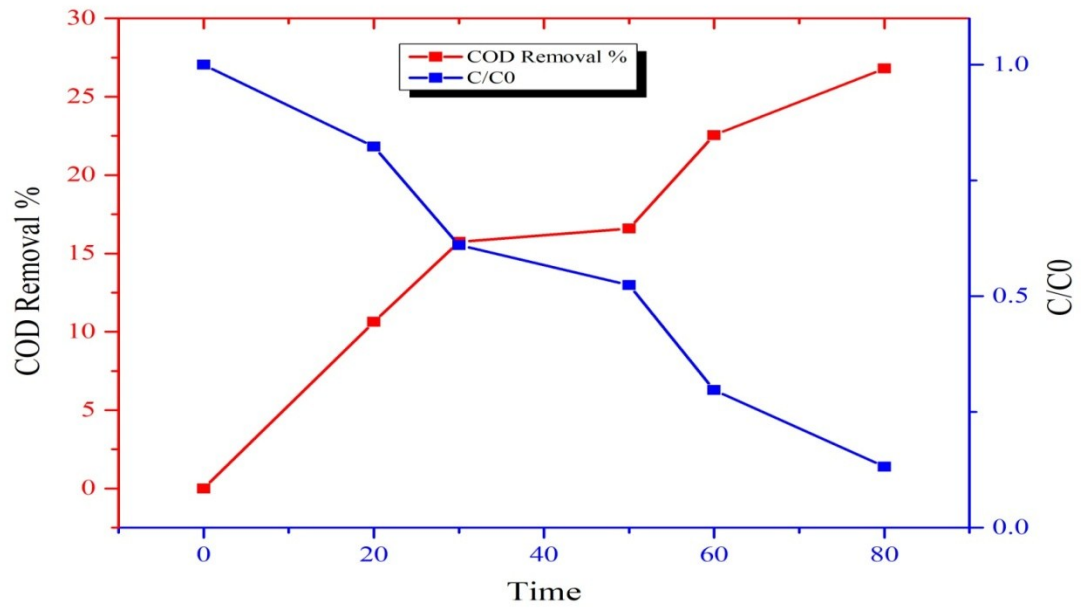

**Fig. 6S** COD curve of the degraded aliquots.
